# Supplementary material
Source: PubMed Central journal article supplement (PMC7446068)
Supplement: jcsm.8476.ds001.pdf [file jcsm.8476.ds001.pdf]

Table S1: Outcome of PAP adherence at one month ( $\geq 4$ h PAP use for  $\geq 70\%$  of days) divided by racial subgroup

| Race                      | Population (n=2571) | Unadjusted Odds Ratio [95% CI] | Unadjusted P-value |
|---------------------------|---------------------|--------------------------------|--------------------|
| White                     | 57%                 | Ref.                           | Ref.               |
| Black                     | 25%                 | 0.66 [0.55 - 0.79]             | <0.001             |
| Asian                     | 6%                  | 1.15 [0.82 – 1.62]             | 0.41               |
| Hawaiian/Pacific Islander | 2%                  | 0.95 [0.53 – 1.70]             | 0.87               |
| American Indian           | 2%                  | 1.16 [0.62 – 2.21]             | 0.64               |

PAP = Positive airway pressure; OR = odds ratio

OR represents the change in odds of 30-day PAP adherence if the variable were true.
